# Supplementary material for: Action of Mangifera indica Leaf Extract on Acne-Prone Skin through Sebum Harmonization and Targeting C. acnes
Source: MDPI journal article supplement (doi:10.3390/molecules27154769), 2022-07-26
Supplement: s1 [file s1]

## Action of *Mangifera indica* leaf extract on acne-prone skin through sebum harmonization and targeting *C. acnes*

### SUPPLEMENTARY DATA

#### Characterization of phytomarkers in *Mangifera indica* extract by HPLC-UV

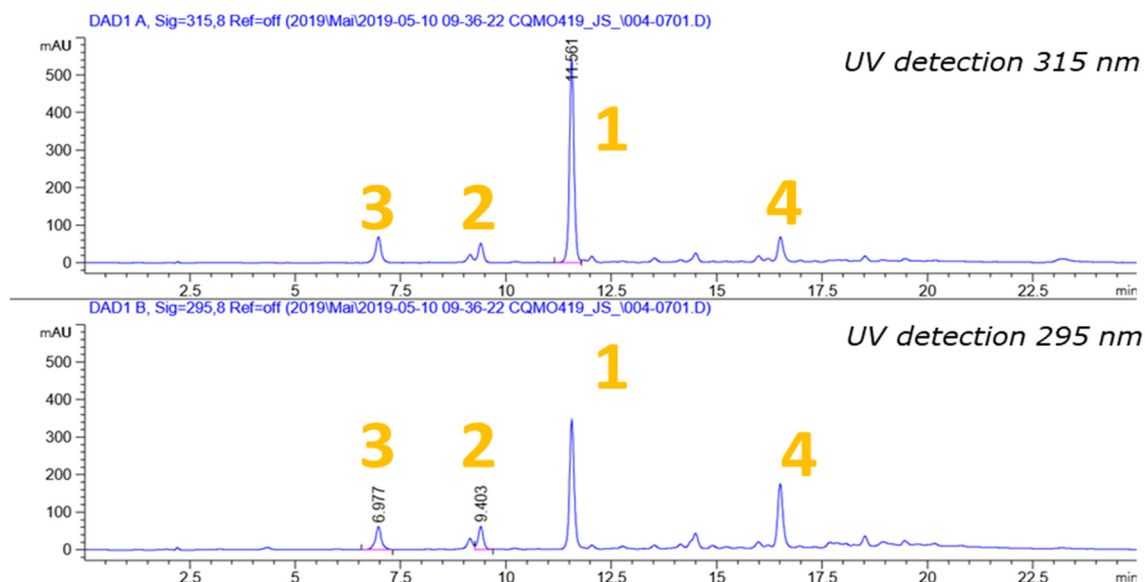

Figure S1: HPLC-UV chromatograms of *Mangifera indica* extract at 315 and 295 nm.

The compounds 1,2,3 and 4 were identified as follows:

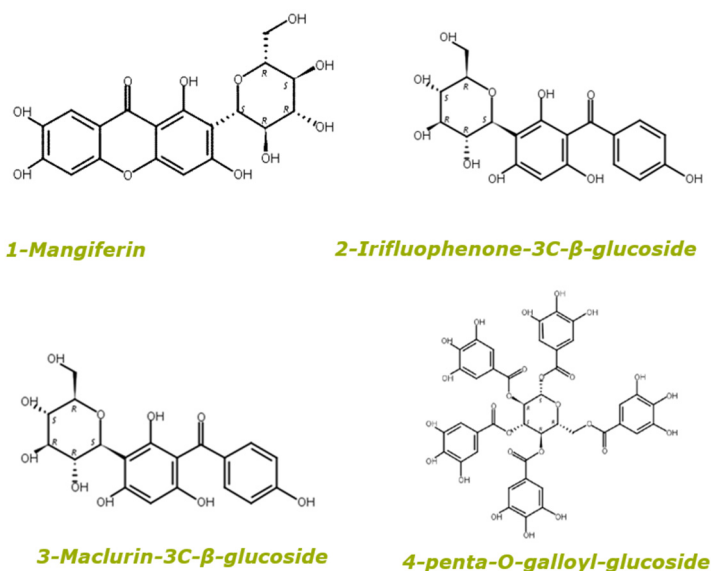

Figure S2: chemical structure of the 4 main phytomarkers

The amount of the four main phytochemicals, which have been quantified in different batches as follows:

| Batch | Mangiferin content (in ppm) | Iriflophenone-C-glucoside content (in ppm) | Maclurin-C-glucoside content (in ppm) | penta-O-galloyl-glucoside (in ppm) |
|-------|-----------------------------|--------------------------------------------|---------------------------------------|------------------------------------|
| a     | 1961.0                      | 65.6.0                                     | 834.5                                 | 958.0                              |
| b     | 1896.0                      | 434.3                                      | 278.2                                 | 816.0                              |

### ***Inverse docking***

*Table S1: Results for maclurin analysis*

| Category                               | Name                                       | Score   | Consequence                                 |
|----------------------------------------|--------------------------------------------|---------|---------------------------------------------|
| <b>Transcription factor / receptor</b> | RXR alpha                                  | 7.1674  | Modulation of lipogenesis                   |
|                                        | Nuclear receptor ROR-alpha                 | 7.1393  |                                             |
|                                        | Glucocorticoid receptor                    | 7.4371  |                                             |
|                                        | Insulin receptor                           | 7.7369  |                                             |
|                                        | IGF1                                       | 8.7891  |                                             |
|                                        | PPAR $\gamma$                              | 7.7828  |                                             |
|                                        | PPAR $\delta$                              | 7.275   |                                             |
| <b>Enzyme</b>                          | Farnesyl pyrophosphate synthase            | 10.7054 | Direct impact on specific proteins of sebum |
|                                        | FAD synthetase                             | 7.5232  |                                             |
|                                        | Cholesterol oxidase                        | 7.5104  |                                             |
|                                        | Fatty acid oxidation complex subunit alpha | 7.0973  |                                             |
|                                        | Squalene synthase                          | 7.0912  |                                             |

### ***Inverse docking***

*Table S2: Results for iriflophenone analysis*

| Category                               | Name                           | Score  | Consequence               |
|----------------------------------------|--------------------------------|--------|---------------------------|
| <b>Transcription factor / receptor</b> | PPAR $\gamma$                  | 9.4758 | Modulation of lipogenesis |
|                                        | PPAR $\alpha$                  | 7.0902 |                           |
|                                        | PPAR $\delta$                  | 7.0194 |                           |
|                                        | Retinoic acid receptor $\beta$ | 7.6238 |                           |

|               |                                                                    |        |                                                           |
|---------------|--------------------------------------------------------------------|--------|-----------------------------------------------------------|
|               | Insulin receptor                                                   | 7.3242 |                                                           |
|               | RXR $\alpha$                                                       | 7.1998 |                                                           |
| <b>Enzyme</b> | FAD synthetase                                                     | 8.4401 | Direct impact on specific proteins of sebum (squalene ++) |
|               | Squalene synthase                                                  | 8.5685 |                                                           |
|               | Cholesterol oxidase                                                | 8.3317 |                                                           |
|               | Farnesyl pyrophosphate synthase                                    | 9.0946 |                                                           |
|               | Farnesyltransferase/geranylgeranyltransferase type-1 subunit alpha | 7.7084 |                                                           |
|               | Farnesyltransferase, CAAX box, alpha                               | 7.4005 |                                                           |

**Supplementary Figure S3:**

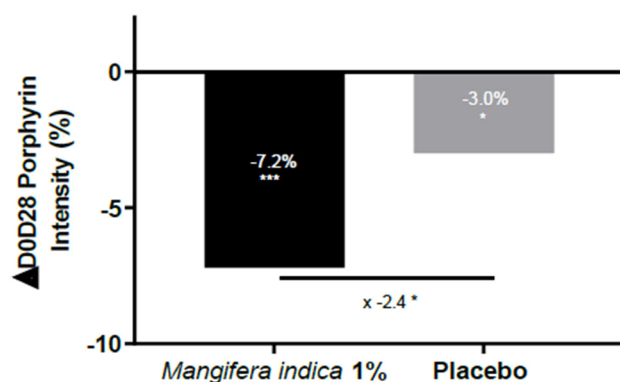

Figure S3: Porphyrin intensity analysis by VISIA® CR 2.3 on Caucasian volunteers (cheek and nose areas) after 28 days of application of cream containing *M. indica* at 1% or placebo.
